# Supplementary material for: Extracellular silica nanocoat formed by layer-by-layer (LBL) self-assembly confers aluminum resistance in root border cells of pea (Pisum sativum)
Source: PubMed Central journal article supplement (PMC6466759; doi:10.1186/s12951-019-0486-y), 2019-04-16

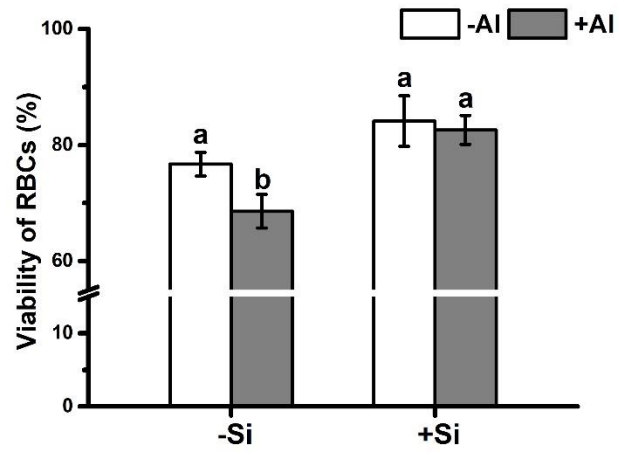

Supplement: 12951_2019_486_MOESM1_ESM.pdf [file 12951_2019_486_MOESM1_ESM.pdf]
